# Supplementary material for: [18F]FMISO PET/CT as a preoperative prognostic factor in patients with pancreatic cancer
Source: PubMed Central journal article supplement (PMC6509312; doi:10.1186/s13550-019-0507-8), 2019-05-09
Supplement: 13550_2019_507_MOESM2_ESM.pdf [file 13550_2019_507_MOESM2_ESM.pdf]

**Table S1**

Patients' characteristics

| Patient | Sex | Age | Body Weight (kg) | Visi-<br>bility | <sup>18</sup> F]FMISO uptake |        | Ope-<br>ration? | Days between<br><sup>18</sup> F]FMISO<br>PET/CT and<br>operation | Tissue<br>acquired by | HIF1- $\alpha$ expression |          | Recurrence<br>after<br>operation? | Recurrence<br>days after<br>operation | Arive? | Follow-up<br>days |
|---------|-----|-----|------------------|-----------------|------------------------------|--------|-----------------|------------------------------------------------------------------|-----------------------|---------------------------|----------|-----------------------------------|---------------------------------------|--------|-------------------|
|         |     |     |                  |                 | TBR<br>peak                  | Binary |                 |                                                                  |                       | Category<br>0-3           | Binary   |                                   |                                       |        |                   |
| 1       | M   | 77  | 53               | Yes             | 1.77                         | High   | No              | N/A                                                              | N/A                   |                           |          |                                   |                                       | No     | 329               |
| 2       | F   | 75  | 39               | No              | 1.08                         | Low    | Yes             | 30                                                               | Operation             | 0                         | Negative | Yes                               | 234                                   | No     | 286               |
| 3       | M   | 76  | 57               | No              | 0.80                         | Low    | Yes             | 13                                                               | Operation             | 1                         | Negative | No                                |                                       | Yes    | 686               |
| 4       | M   | 75  | 59               | No              | 1.03                         | Low    | Yes             | 6                                                                | Operation             | 1                         | Negative | Yes                               | 332                                   | No     | 746               |
| 5       | F   | 76  | 45               | No              | 1.11                         | Low    | Yes             | 20                                                               | Operation             | 1                         | Negative | Yes                               | 309                                   | No     | 414               |
| 6       | M   | 67  | 57               | No              | 1.13                         | Low    | Yes             | 5                                                                | Operation             | 3                         | Positive | Yes                               | 353                                   | No     | 587               |
| 7       | F   | 60  | 49               | Yes             | 2.19                         | High   | No              | N/A                                                              | N/A                   |                           |          |                                   |                                       | No     | 39                |
| 8       | F   | 67  | 58               | Yes             | 1.48                         | High   | No              | N/A                                                              | N/A                   |                           |          |                                   |                                       | No     | 346               |
| 9       | M   | 67  | 66               | No              | 1.04                         | Low    | Yes             | 7                                                                | Operation             | 2                         | Positive | Yes                               | 234                                   | Yes    | 1101              |
| 10      | F   | 73  | 48               | No              | 0.89                         | Low    | Yes             | 11                                                               | Operation             | 0                         | Negative | Yes                               | 561                                   | Yes    | 591               |
| 11      | M   | 61  | 69               | Yes             | 1.24                         | Low    | Yes             | 14                                                               | Operation             | 3                         | Positive | Yes                               | 441                                   | Yes    | 869               |
| 12      | F   | 69  | 47               | Yes             | 1.70                         | High   | Yes             | 25                                                               | Operation             | 3                         | Positive | Yes                               | 60                                    | No     | 415               |
| 13      | M   | 74  | 61               | No              | 1.09                         | Low    | Yes             | 16                                                               | Operation             | 2                         | Positive | No                                |                                       | Yes    | 869               |
| 14      | F   | 60  | 58               | No              | 1.02                         | Low    | Yes             | 9                                                                | Operation             | 2                         | Positive | No                                |                                       | Yes    | 850               |
| 15      | F   | 81  | 52               | No              | 1.15                         | Low    | Yes             | 4                                                                | Operation             | 3                         | Positive | Yes                               | 85                                    | No     | 137               |
| 16      | M   | 62  | 65               | Yes             | 1.50                         | High   | Yes             | 28                                                               | Operation             | 1                         | Negative | Yes                               | 218                                   | No     | 369               |
| 17      | M   | 76  | 53               | No              | 0.85                         | Low    | No              | N/A                                                              | Biopsy                | 1                         | Negative |                                   |                                       | Yes    | 477               |
| 18      | M   | 78  | 57               | Yes             | 1.51                         | High   | Yes             | 2                                                                | Operation             | 2                         | Positive | Yes                               | 246                                   | No     | 437               |
| 19      | M   | 73  | 40               | Yes             | 1.27                         | High   | No              | N/A                                                              | Biopsy                | 2                         | Positive |                                   |                                       | No     | 209               |
| 20      | F   | 69  | 53               | No              | 1.22                         | Low    | Yes             | 18                                                               | Operation             | 1                         | Negative | No                                |                                       | Yes    | 358               |
| 21      | M   | 77  | 60               | No              | 1.06                         | Low    | Yes             | 16                                                               | Operation             | 0                         | Negative | No                                |                                       | Yes    | 310               |
| 22      | F   | 74  | 49               | No              | 1.17                         | Low    | Yes             | 16                                                               | Operation             | 1                         | Negative | No                                |                                       | Yes    | 283               |
| 23      | M   | 58  | 80               | No              | 1.20                         | Low    | Yes             | 27                                                               | Operation             | 1                         | Negative | No                                |                                       | Yes    | 296               |
| 24      | M   | 62  | 74               | Yes             | 1.19                         | Low    | Yes             | 14                                                               | Operation             | 1                         | Negative | Yes                               | 241                                   | Yes    | 282               |
| 25      | F   | 69  | 50               | No              | 1.09                         | Low    | Yes             | 25                                                               | Operation             | 3                         | Positive | No                                |                                       | Yes    | 190               |

<sup>18</sup>F]FMISO, [<sup>18</sup>F]fluoromisonidazole; TBRpeak, Tumor blood ratio using SUVpeak (SUVpeak of the tumor divided by SUVpeak of the aorta); SUV, Standardized uptake value; HIF, Hypoxia-inducible factor, N/A Not applicable.
