# Supplementary material for: [18F]FMISO PET/CT as a preoperative prognostic factor in patients with pancreatic cancer
Source: PubMed Central journal article supplement (PMC6509312; doi:10.1186/s13550-019-0507-8), 2019-05-09
Supplement: 13550_2019_507_MOESM3_ESM.pdf [file 13550_2019_507_MOESM3_ESM.pdf]

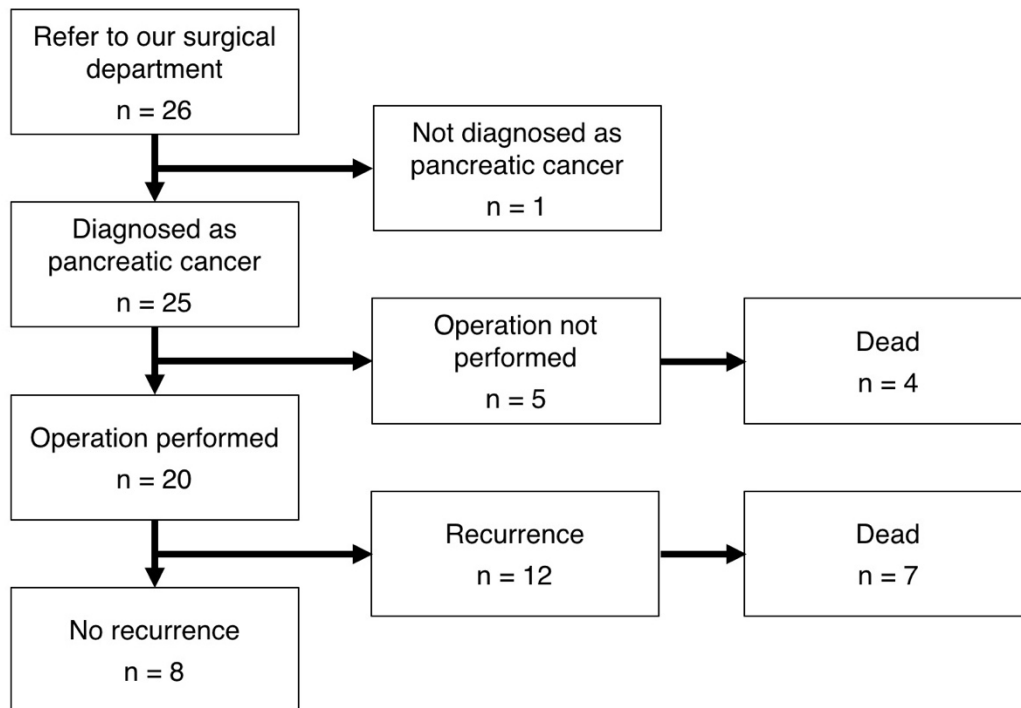

**Fig. S2**

Flow diagram of the patients
