# Supplementary material for: [18F]FMISO PET/CT as a preoperative prognostic factor in patients with pancreatic cancer
Source: EJNMMI Res. 2019 May 9;9:39. doi: 10.1186/s13550-019-0507-8 (PMC6509312; doi:10.1186/s13550-019-0507-8)
Supplement: Supplementary file 1 — Figure S1. Three-dimensional region of interest (ROI) replacement. SUVpeak of the tumor (arrows) was divided by SUVpeak of the aorta (arrowheads), and we defined tumor-blood ratio using SUVpeak (TBRpeak) as the quantitative value. SUVpeak was defined as the mean value of the voxels within a fixed sphere of 1-cm3 volume centered on the hottest area of the ROI over the tumor. SUV, standardized uptake value. (PDF 221 kb) [file 13550_2019_507_MOESM1_ESM.pdf]

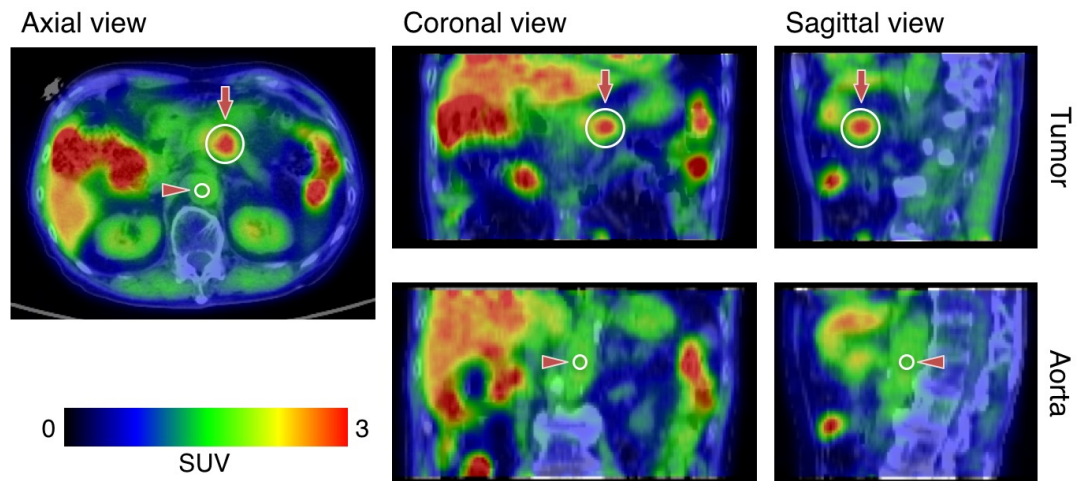

**Fig. S1**

Three-dimensional region of interest (ROI) replacement. SUV<sub>peak</sub> of the tumor (arrows) was divided by SUV<sub>peak</sub> of the aorta (arrowheads), and we defined tumor blood ratio using SUV<sub>peak</sub> (TBR<sub>peak</sub>) as the quantitative value. SUV<sub>peak</sub> was defined as the mean value of the voxels within a fixed sphere of 1-cm<sup>3</sup> volume centered on the hottest area of the ROI over the tumor. SUV, standardized uptake value
